# Supplementary material
Source: PubMed Central journal article supplement (PMC3609896)
Supplement: NIHMS419454-supplement-1.pdf [file NIHMS419454-supplement-1.pdf]

## Supporting Material 1: Description of variables considered and their missing rate.

The table below describes the variables used for feature selection. It shows for each variable:

- Period is ADM, PRE, PER or POST whether the variable was considered before, during or after the hypotensive episode;
- Stat refers to the statistic used to represent samples present within the considered time window. It can be MINV, MEDV, MAXV or STDV standing for minimum, median, maximum value, and standard deviation respectively.
- Overall (survivors and non-survivors) quartiles;
- P-value from Mann-Whitney U test between survivors and non-survivors groups;
- Quartiles for survivors;
- Quartiles for non-survivors;
- Number of observation present in surviving group (maximum is 1526);
- Number of observation present in non-surviving group (maximum is 616);
- Overall rate of missing data;

Variables are sorted by decreasing p-value and those included in the final model are printed in bold.

| Variable                                          | Time Window | Operator   | Median (IQ 25-75)               | P-value         | Median Alive (IQ 25-75)         | Median Dead (IQ 25-75)         | Survivors Size | Non-survivors Size | Percentage of missing data |
|---------------------------------------------------|-------------|------------|---------------------------------|-----------------|---------------------------------|--------------------------------|----------------|--------------------|----------------------------|
| <b>Glasgow Coma Scale (GCS)</b>                   | <b>POST</b> |            | <b>11.00 (8.00-15.00)</b>       | <b>2.31E-46</b> | <b>13.50 (9.00-15.00)</b>       | <b>9.00 (6.00-13.00)</b>       | <b>1514</b>    | <b>607</b>         | <b>1.0</b>                 |
| <b>Sequential Organ Failure Assessment (SOFA)</b> | <b>POST</b> |            | <b>7.00 (4.00-10.00)</b>        | <b>3.62E-45</b> | <b>6.00 (3.00-9.00)</b>         | <b>10.00 (6.00-12.00)</b>      | <b>1526</b>    | <b>616</b>         | <b>0.0</b>                 |
| <b>Simplified Acute Physiology Score (SAPS) I</b> | <b>POST</b> |            | <b>16.00 (13.00-20.00)</b>      | <b>7.98E-44</b> | <b>15.00 (12.00-19.00)</b>      | <b>19.00 (16.00-23.00)</b>     | <b>1374</b>    | <b>511</b>         | <b>12.0</b>                |
| <b>Urine Output (mL)</b>                          | <b>POST</b> |            | <b>1188.00 (624.75-1970.00)</b> | <b>9.00E-42</b> | <b>1368.00 (820.00-2130.00)</b> | <b>666.00 (175.00-1426.25)</b> | <b>1398</b>    | <b>533</b>         | <b>9.9</b>                 |
| Blood Urea Nitrogen (mg/dL)                       | POST        |            | 30.00 (17.00-50.00)             | 1.92E-36        | 25.00 (15.00-43.00)             | 42.00 (26.00-65.25)            | 1427           | 581                | 6.3                        |
| <b>Acute Physiology Score (APS)</b>               | <b>ADM</b>  |            | <b>50.00 (36.00-63.00)</b>      | <b>1.34E-32</b> | <b>47.00 (33.00-59.00)</b>      | <b>58.00 (44.00-74.00)</b>     | <b>1526</b>    | <b>616</b>         | <b>0.0</b>                 |
| <b>Blood Urea Nitrogen (mg/dL)</b>                | <b>PRE</b>  |            | <b>29.00 (17.00-50.00)</b>      | <b>9.24E-32</b> | <b>25.00 (15.00-43.00)</b>      | <b>43.00 (24.00-67.25)</b>     | <b>1230</b>    | <b>513</b>         | <b>18.6</b>                |
| <b>International Normalized Ratio</b>             | <b>POST</b> |            | <b>1.40 (1.20-1.90)</b>         | <b>2.21E-29</b> | <b>1.30 (1.20-1.70)</b>         | <b>1.70 (1.40-2.50)</b>        | <b>995</b>     | <b>487</b>         | <b>30.8</b>                |
| Simplified Acute Physiology Score (SAPS) I        | ADM         |            | 17.00 (13.00-20.00)             | 3.18E-29        | 16.00 (12.00-19.25)             | 19.00 (15.00-23.00)            | 1453           | 569                | 5.6                        |
| <b>Lactate (mg/dL)</b>                            | <b>POST</b> | <b>MAX</b> | <b>2.10 (1.40-3.70)</b>         | <b>5.20E-22</b> | <b>1.90 (1.30-2.80)</b>         | <b>2.90 (1.70-6.40)</b>        | <b>620</b>     | <b>365</b>         | <b>54.0</b>                |

Dynamic data during hypotensive episode improves mortality predictions among patients with sepsis and hypotension

# Supporting Material 1: Description of variables considered and their missing rate.

| Variable                                          | Time Window  | Operator   | Median (IQ 25-75)             | P-value         | Median Alive (IQ 25-75)       | Median Dead (IQ 25-75)        | Survivors Size | Non-survivors Size | Percentage of missing data |
|---------------------------------------------------|--------------|------------|-------------------------------|-----------------|-------------------------------|-------------------------------|----------------|--------------------|----------------------------|
| Creatinine Clearance (ml/min)                     | POST         |            | 41.56 (26.54-66.05)           | 1.53E-21        | 48.23 (30.38-72.87)           | 31.07 (20.22-52.33)           | 971            | 451                | 33.6                       |
| Number of pressor used                            | PRE-PER      |            | 1.00 (0.00-1.00)              | 1.01E-20        | 0.00 (0.00-1.00)              | 1.00 (0.00-2.00)              | 1526           | 616                | 0.0                        |
| Creatinine (mg/dL)                                | POST         |            | 1.30 (0.80-2.30)              | 1.27E-20        | 1.10 (0.80-1.90)              | 1.80 (1.00-2.90)              | 1426           | 581                | 6.3                        |
| <b>Van Walraven Score</b>                         | <b>ADM</b>   |            | <b>10.00 (5.00-15.00)</b>     | <b>2.78E-20</b> | <b>8.00 (3.00-14.00)</b>      | <b>12.00 (7.00-17.00)</b>     | <b>1526</b>    | <b>616</b>         | <b>0.0</b>                 |
| <b>Glasgow Coma Scale (GCS)</b>                   | <b>DELTA</b> |            | <b>0.00 (-0.50-1.00)</b>      | <b>8.15E-20</b> | <b>0.00 (0.00-1.00)</b>       | <b>0.00 (-2.00-0.00)</b>      | <b>1434</b>    | <b>577</b>         | <b>6.1</b>                 |
| Urine Output (mL)                                 | PER          |            | 107.00 (45.00-240.00)         | 2.57E-19        | 120.00 (60.00-270.00)         | 66.00 (25.00-160.00)          | 1315           | 486                | 15.9                       |
| Creatinine Clearance (ml/min)                     | PRE          |            | 43.96 (26.40-69.70)           | 1.34E-17        | 49.55 (30.75-76.78)           | 32.99 (20.43-53.62)           | 851            | 396                | 41.8                       |
| <b>International Normalized Ratio</b>             | <b>PRE</b>   |            | <b>1.50 (1.20-1.80)</b>       | <b>4.40E-17</b> | <b>1.40 (1.20-1.70)</b>       | <b>1.60 (1.30-2.40)</b>       | <b>987</b>     | <b>418</b>         | <b>34.4</b>                |
| <b>Sequential Organ Failure Assessment (SOFA)</b> | <b>PRE</b>   |            | <b>0.00 (0.00-5.00)</b>       | <b>5.01E-17</b> | <b>0.00 (0.00-4.00)</b>       | <b>0.00 (0.00-8.00)</b>       | <b>1526</b>    | <b>616</b>         | <b>0.0</b>                 |
| Creatinine (mg/dL)                                | PRE          |            | 1.20 (0.80-2.20)              | 8.94E-17        | 1.10 (0.80-1.80)              | 1.70 (1.00-2.90)              | 1229           | 512                | 18.7                       |
| Phosphorus (mg/dL)                                | POST         |            | 3.60 (2.80-4.80)              | 2.47E-15        | 3.50 (2.70-4.40)              | 4.20 (3.10-5.70)              | 995            | 430                | 33.5                       |
| Renal Replacement Therapy                         | ADM          |            | 0.00 (0.00-0.00)              | 3.47E-15        | 0.00 (0.00-0.00)              | 0.00 (0.00-0.00)              | 1526           | 616                | 0.0                        |
| <b>Breathing Rate (resp/min)</b>                  | <b>PRE</b>   | <b>MIN</b> | <b>17.00 (14.00-22.00)</b>    | <b>5.23E-15</b> | <b>17.00 (14.00-21.00)</b>    | <b>19.00 (15.00-24.00)</b>    | <b>1507</b>    | <b>611</b>         | <b>1.1</b>                 |
| <b>Temperature (°C)</b>                           | <b>POST</b>  |            | <b>36.33 (35.83-36.89)</b>    | <b>8.29E-15</b> | <b>36.44 (36.00-36.94)</b>    | <b>36.11 (35.61-36.67)</b>    | <b>1515</b>    | <b>609</b>         | <b>0.8</b>                 |
| Arterial pH                                       | POST         |            | 7.34 (7.27-7.39)              | 2.43E-14        | 7.35 (7.30-7.40)              | 7.30 (7.21-7.38)              | 944            | 474                | 33.8                       |
| <b>Bilirubin (mg/dL)</b>                          | <b>PRE</b>   |            | <b>1.10 (0.50-3.80)</b>       | <b>3.39E-14</b> | <b>0.90 (0.40-2.09)</b>       | <b>2.40 (0.75-9.70)</b>       | <b>411</b>     | <b>254</b>         | <b>69.0</b>                |
| Platelets (10 <sup>3</sup> /µL)                   | POST         |            | 170.00 (102.00-249.00)        | 5.33E-13        | 178.00 (114.00-252.00)        | 137.50 (64.50-234.00)         | 1414           | 580                | 6.9                        |
| Bilirubin (mg/dL)                                 | POST         |            | 1.40 (0.60-4.12)              | 6.16E-13        | 1.00 (0.50-2.77)              | 2.50 (0.70-8.70)              | 459            | 310                | 64.1                       |
| Urine Output (mL)                                 | DELTA        |            | 255.00 (-226.75-970.00)       | 7.07E-12        | 1083.50                       | 16.00 (-276.50-496.25)        | 1336           | 493                | 14.6                       |
| Glasgow Coma Scale (GCS)                          | PRE          |            | 14.00 (10.00-15.00)           | 1.10E-11        | 14.00 (10.00-15.00)           | 11.00 (8.00-15.00)            | 1445           | 586                | 5.2                        |
| Phosphorus (mg/dL)                                | PRE          |            | 3.70 (2.90-4.80)              | 1.31E-11        | 3.50 (2.80-4.40)              | 4.30 (3.10-5.50)              | 819            | 386                | 43.7                       |
| <b>Oxygen Gradient (mmHg)</b>                     | <b>POST</b>  |            | <b>173.75 (131.50-241.50)</b> | <b>2.25E-11</b> | <b>165.75 (124.75-228.50)</b> | <b>206.75 (144.50-272.12)</b> | <b>794</b>     | <b>440</b>         | <b>42.4</b>                |
| Breathing Rate (resp/min)                         | POST         | MIN        | 18.00 (14.00-22.00)           | 4.00E-11        | 17.00 (14.00-21.00)           | 19.00 (16.00-24.00)           | 1504           | 611                | 1.3                        |

Dynamic data during hypotensive episode improves mortality predictions among patients with sepsis and hypotension

# Supporting Material 1: Description of variables considered and their missing rate.

| Variable                                                                                              | Time Window  | Operator   | Median (IQ 25-75)             | P-value         | Median Alive (IQ 25-75)       | Median Dead (IQ 25-75)      | Survivors Size | Non-survivors Size | Percentage of missing data |
|-------------------------------------------------------------------------------------------------------|--------------|------------|-------------------------------|-----------------|-------------------------------|-----------------------------|----------------|--------------------|----------------------------|
| Urine Output (mL)                                                                                     | PRE          |            | 717.00 (244.00-1570.00)       | 4.77E-11        | 820.00 (302.50-1685.00)       | 515.50 (150.00-1300.00)     | 1352           | 506                | 13.3                       |
| <b>Partial Oxygen Arterial Pressure (mmHg)</b>                                                        | <b>DELTA</b> |            | <b>-24.00 (-142.25-18.00)</b> | <b>5.75E-11</b> | <b>-35.00 (-173.75-10.00)</b> | <b>-4.00 (-60.00-31.00)</b> | <b>775</b>     | <b>366</b>         | <b>46.7</b>                |
| <b>Blood Urea Nitrogen (mg/dL)CreatR</b>                                                              | <b>POST</b>  |            | <b>21.67 (15.38-29.09)</b>    | <b>5.92E-11</b> | <b>20.37 (15.00-27.50)</b>    | <b>24.00 (17.20-35.05)</b>  | <b>1425</b>    | <b>581</b>         | <b>6.3</b>                 |
| Saturation of Peripheral Oxygen (%)                                                                   | PER          | MIN        | 97.00 (94.00-98.00)           | 7.33E-11        | 97.00 (95.00-99.00)           | 96.00 (93.00-98.00)         | 1518           | 600                | 1.1                        |
| Breathing Rate (resp/min)                                                                             | PER          | MED        | 19.50 (16.00-24.00)           | 8.10E-11        | 19.00 (16.00-23.00)           | 20.50 (17.00-25.00)         | 1496           | 606                | 1.9                        |
| <b>Saturation of Peripheral Oxygen (%)</b>                                                            | <b>PRE</b>   | <b>MED</b> | <b>98.00 (96.00-100.00)</b>   | <b>8.14E-11</b> | <b>98.00 (96.50-100.00)</b>   | <b>97.50 (95.50-99.00)</b>  | <b>1513</b>    | <b>604</b>         | <b>1.2</b>                 |
| Platelets (10 <sup>3</sup> /µL)                                                                       | PRE          |            | 176.00 (111.00-265.00)        | 9.41E-11        | 185.00 (126.00-270.00)        | 146.50 (70.00-252.00)       | 1231           | 506                | 18.9                       |
| Mechanical Ventilation                                                                                | N.A.         |            | 1.00 (0.00-1.00)              | 1.21E-10        | 1.00 (0.00-1.00)              | 1.00 (1.00-1.00)            | 1526           | 616                | 0.0                        |
| Partial Oxygen Arterial Pressure (mmHg)                                                               | PRE          |            | 93.00 (74.00-129.00)          | 1.96E-10        | 97.50 (75.00-140.00)          | 84.00 (68.00-109.00)        | 930            | 406                | 37.6                       |
| Partial Arterial Oxygen Pressure to Fraction of Inspired Oxygen (PaO <sub>2</sub> /FiO <sub>2</sub> ) | POST         |            | 195.00 (142.00-265.00)        | 4.60E-10        | 205.00 (150.00-275.00)        | 174.64 (126.00-249.00)      | 794            | 440                | 42.4                       |
| Heart Rate to Systolic Blood Pressure Ratio (1/min/mmHg)                                              | PER          | MED        | 0.93 (0.77-1.10)              | 6.82E-10        | 0.91 (0.76-1.07)              | 0.99 (0.81-1.18)            | 1526           | 615                | 0.0                        |
| Lactate (mg/dL)                                                                                       | PRE          |            | 2.30 (1.50-3.80)              | 7.29E-10        | 2.10 (1.40-3.30)              | 2.80 (1.70-5.40)            | 624            | 310                | 56.4                       |
| Blood Urea Nitrogen (mg/dL)CreatR                                                                     | PRE          |            | 22.00 (16.00-30.00)           | 2.09E-09        | 20.91 (15.69-28.75)           | 25.00 (17.26-35.44)         | 1229           | 512                | 18.7                       |
| Heart Rate to Systolic Blood Pressure Ratio (1/min/mmHg)                                              | PRE          | MIN        | 0.95 (0.79-1.14)              | 2.11E-09        | 0.93 (0.78-1.11)              | 1.02 (0.82-1.22)            | 1517           | 615                | 0.5                        |
| <b>Saturation of Peripheral Oxygen (%)</b>                                                            | <b>PER</b>   | <b>STD</b> | <b>0.98 (0.50-1.87)</b>       | <b>3.14E-09</b> | <b>0.86 (0.45-1.70)</b>       | <b>1.22 (0.58-2.16)</b>     | <b>1518</b>    | <b>600</b>         | <b>1.1</b>                 |
| Partial Arterial Oxygen Pressure to Fraction of Inspired Oxygen (PaO <sub>2</sub> /FiO <sub>2</sub> ) | PRE          |            | 196.00 (141.43-287.50)        | 4.06E-09        | 208.50 (150.50-303.88)        | 170.00 (122.00-246.00)      | 792            | 354                | 46.5                       |
| Simplified Acute Physiology Score (SAPS) I                                                            | PRE          |            | 15.00 (12.00-18.00)           | 8.02E-09        | 15.00 (12.00-18.00)           | 17.00 (14.00-20.00)         | 471            | 247                | 66.5                       |

Dynamic data during hypotensive episode improves mortality predictions among patients with sepsis and hypotension

# Supporting Material 1: Description of variables considered and their missing rate.

| Variable                                                        | Time Window | Operator   | Median (IQ 25-75)          | P-value         | Median Alive (IQ 25-75)    | Median Dead (IQ 25-75)     | Survivors Size | Non-survivors Size | Percentage of missing data |
|-----------------------------------------------------------------|-------------|------------|----------------------------|-----------------|----------------------------|----------------------------|----------------|--------------------|----------------------------|
| Lactate (mg/dL)                                                 | DELTA       | MAX        | -0.20 (-1.10-0.50)         | 9.90E-09        | -0.30 (-1.30-0.30)         | 0.10 (-0.50-1.20)          | 389            | 224                | 71.4                       |
| Heart Rate (beats/min)                                          | PER         | MAX        | 93.00 (80.00-107.00)       | 2.09E-08        | 91.00 (79.00-105.00)       | 97.00 (83.00-113.00)       | 1526           | 616                | 0.0                        |
| <b>Heart Rate to Systolic Blood Pressure Ratio (1/min/mmHg)</b> | <b>POST</b> | <b>MAX</b> | <b>0.80 (0.66-0.96)</b>    | <b>2.84E-08</b> | <b>0.78 (0.66-0.93)</b>    | <b>0.85 (0.68-1.02)</b>    | <b>1526</b>    | <b>614</b>         | <b>0.1</b>                 |
| Partial Oxygen Arterial Pressure (mmHg)                         | POST        |            | 87.00 (70.00-109.00)       | 5.85E-08        | 90.00 (73.00-114.00)       | 80.00 (65.00-102.00)       | 924            | 474                | 34.7                       |
| Central Venous Pressure (mmHg)                                  | PRE         | MIN        | 8.00 (5.00-12.00)          | 7.03E-08        | 8.00 (5.00-11.00)          | 10.00 (7.00-14.00)         | 713            | 274                | 53.9                       |
| White Blood Cells count (x10 <sup>9</sup> /L)                   | POST        |            | 12.40 (8.90-17.80)         | 8.45E-08        | 11.95 (8.90-16.60)         | 14.35 (9.05-20.80)         | 1414           | 580                | 6.9                        |
| International Normalized Ratio                                  | DELTA       |            | 0.00 (-0.20-0.10)          | 9.48E-08        | 0.00 (-0.20-0.10)          | 0.00 (-0.10-0.30)          | 706            | 348                | 50.8                       |
| Chloride (mEq/L)                                                | PRE         |            | 106.00 (101.00-110.00)     | 1.85E-07        | 107.00 (102.00-111.00)     | 104.00 (99.00-110.00)      | 1003           | 401                | 34.5                       |
| Partial Carbon Dioxide Arterial Pressure (mmHg)                 | POST        |            | 35.00 (30.00-40.00)        | 3.35E-07        | 36.00 (31.00-40.00)        | 34.00 (28.00-39.00)        | 924            | 474                | 34.7                       |
| Heart Rate (beats/min)                                          | PRE         | MIN        | 83.00 (71.00-97.00)        | 4.16E-07        | 82.00 (70.00-95.00)        | 88.00 (74.00-100.50)       | 1526           | 616                | 0.0                        |
| <b>Temperature (°C)</b>                                         | <b>PRE</b>  |            | <b>36.33 (35.72-36.94)</b> | <b>1.61E-06</b> | <b>36.39 (35.80-37.00)</b> | <b>36.11 (35.56-36.83)</b> | <b>1489</b>    | <b>595</b>         | <b>2.7</b>                 |
| Heart Rate (beats/min)                                          | POST        | MAX        | 94.00 (80.00-107.00)       | 3.84E-06        | 92.00 (80.00-105.00)       | 97.00 (83.00-112.00)       | 1526           | 615                | 0.0                        |
| Glucose (mg/dL)                                                 | POST        |            | 140.00 (114.00-177.00)     | 3.89E-06        | 137.00 (112.50-171.00)     | 148.00 (119.00-190.00)     | 1448           | 584                | 5.1                        |
| Mean Arterial Blood Pressure (mmHg)                             | PER         | MED        | 58.50 (56.00-61.00)        | 5.07E-06        | 59.00 (56.00-61.33)        | 58.00 (55.00-60.00)        | 1526           | 615                | 0.0                        |
| Time from admission to hypotensive episode onset (hours)        | N.A.        |            | 14.67 (5.42-52.58)         | 5.73E-06        | 12.95 (5.30-40.75)         | 23.27 (5.91-83.13)         | 1526           | 616                | 0.0                        |
| <b>Age (yrs)</b>                                                | <b>ADM</b>  |            | <b>71.55 (59.60-80.80)</b> | <b>8.25E-06</b> | <b>70.90 (58.85-79.40)</b> | <b>73.80 (62.00-83.10)</b> | <b>1447</b>    | <b>587</b>         | <b>5.0</b>                 |
| Oxygen Gradient (mmHg)                                          | PRE         |            | 183.75 (132.31-259.50)     | 9.41E-06        | 175.38 (123.25-247.88)     | 214.25 (149.06-291.50)     | 792            | 353                | 46.5                       |
| Systolic Arterial Blood Pressure (mmHg)                         | PER         | MED        | 93.00 (87.00-101.00)       | 1.14E-05        | 93.50 (87.50-101.50)       | 91.50 (85.00-99.00)        | 1526           | 615                | 0.0                        |

Dynamic data during hypotensive episode improves mortality predictions among patients with sepsis and hypotension

## Supporting Material 1: Description of variables considered and their missing rate.

| Variable                                       | Time Window | Operator   | Median (IQ 25-75)          | P-value         | Median Alive (IQ 25-75)    | Median Dead (IQ 25-75)     | Survivors Size | Non-survivors Size | Percentage of missing data |
|------------------------------------------------|-------------|------------|----------------------------|-----------------|----------------------------|----------------------------|----------------|--------------------|----------------------------|
| Chloride (mEq/L)                               | POST        |            | 107.00 (103.00-110.00)     | 1.58E-05        | 107.00 (104.00-111.00)     | 106.00 (100.00-110.00)     | 1118           | 446                | 27.0                       |
| Mean Arterial Blood Pressure (mmHg)            | POST        | MED        | 66.00 (62.17-71.00)        | 1.93E-05        | 66.50 (62.50-71.50)        | 65.50 (61.50-70.00)        | 1526           | 615                | 0.0                        |
| Saturation of Peripheral Oxygen (%)            | POST        | MIN        | 96.00 (94.00-98.00)        | 2.40E-05        | 97.00 (95.00-98.00)        | 96.00 (93.00-98.00)        | 1514           | 599                | 1.4                        |
| White Blood Cells count (x10 <sup>9</sup> /L)  | DELTA       |            | -0.30 (-3.10-2.20)         | 2.72E-05        | -0.70 (-3.38-1.80)         | 0.20 (-2.50-3.20)          | 1103           | 474                | 26.4                       |
| Arterial pH                                    | DELTA       |            | 0.01 (-0.04-0.06)          | 2.78E-05        | 0.01 (-0.03-0.06)          | -0.01 (-0.07-0.06)         | 792            | 366                | 45.9                       |
| Central Venous Pressure (mmHg)                 | POST        | MIN        | 9.00 (6.00-13.00)          | 5.75E-05        | 9.00 (6.00-12.00)          | 10.00 (7.00-14.50)         | 807            | 336                | 46.6                       |
| Simplified Acute Physiology Score (SAPS) I     | DELTA       |            | 0.00 (-3.00-3.00)          | 6.05E-05        | 0.00 (-3.00-2.00)          | 1.00 (-2.00-4.00)          | 454            | 229                | 68.1                       |
| Magnesium (mg/dL)                              | PRE         |            | 1.90 (1.70-2.20)           | 7.25E-05        | 1.90 (1.70-2.20)           | 2.00 (1.70-2.30)           | 890            | 397                | 39.9                       |
| Systolic Arterial Blood Pressure (mmHg)        | POST        | MED        | 104.00 (95.50-113.00)      | 8.89E-05        | 105.00 (96.50-114.00)      | 102.00 (94.00-111.00)      | 1526           | 615                | 0.0                        |
| Glucose (mg/dL)                                | DELTA       |            | -5.00 (-33.00-28.00)       | 1.15E-04        | -6.00 (-34.00-23.00)       | 3.00 (-30.00-44.00)        | 1236           | 497                | 19.1                       |
| Potassium (mg/dL)                              | POST        |            | 4.30 (3.90-4.70)           | 3.01E-04        | 4.20 (3.90-4.70)           | 4.30 (4.00-4.90)           | 1447           | 585                | 5.1                        |
| Central Venous Pressure (mmHg)                 | PRE         | STD        | 1.59 (0.82-2.63)           | 3.02E-04        | 1.71 (0.96-2.65)           | 1.41 (0.58-2.16)           | 713            | 274                | 53.9                       |
| Arterial pH                                    | PRE         |            | 7.34 (7.27-7.39)           | 3.34E-04        | 7.34 (7.28-7.39)           | 7.32 (7.23-7.39)           | 935            | 408                | 37.3                       |
| Bilirubin (mg/dL)                              | DELTA       |            | 0.00 (-0.40-0.60)          | 3.51E-04        | 0.00 (-0.40-0.40)          | 0.10 (-0.22-1.50)          | 226            | 169                | 81.6                       |
| <b>Systolic Arterial Blood Pressure (mmHg)</b> | <b>PRE</b>  | <b>MIN</b> | <b>88.00 (81.00-95.00)</b> | <b>4.01E-04</b> | <b>88.00 (81.00-95.00)</b> | <b>86.00 (78.00-94.00)</b> | <b>1517</b>    | <b>615</b>         | <b>0.5</b>                 |
| Mean Arterial Blood Pressure (mmHg)            | PRE         | STD        | 8.18 (5.12-12.31)          | 7.46E-04        | 8.50 (5.52-12.73)          | 7.41 (4.54-11.19)          | 838            | 357                | 44.2                       |
| <b>Saturation of Peripheral Oxygen (%)</b>     | <b>PRE</b>  | <b>STD</b> | <b>1.00 (0.52-1.99)</b>    | <b>8.69E-04</b> | <b>1.00 (0.50-1.89)</b>    | <b>1.17 (0.58-2.11)</b>    | <b>1513</b>    | <b>604</b>         | <b>1.2</b>                 |
| Magnesium (mg/dL)                              | POST        |            | 2.10 (1.90-2.40)           | 8.70E-04        | 2.10 (1.90-2.30)           | 2.20 (2.00-2.40)           | 1087           | 441                | 28.7                       |
| Central Venous Pressure (mmHg)                 | PER         | MAX        | 13.00 (9.00-17.00)         | 8.74E-04        | 12.00 (9.00-16.00)         | 13.00 (9.00-19.00)         | 759            | 318                | 49.7                       |
| Saturation of Peripheral Oxygen (%)            | POST        | STD        | 1.00 (0.50-1.76)           | 9.43E-04        | 0.96 (0.50-1.73)           | 1.15 (0.55-2.06)           | 1514           | 599                | 1.4                        |
| Blood Urea Nitrogen (mg/dL)                    | DELTA       |            | 0.00 (-4.00-4.00)          | 1.32E-03        | 0.00 (-4.00-3.13)          | 1.00 (-3.50-5.88)          | 1153           | 487                | 23.4                       |

Dynamic data during hypotensive episode improves mortality predictions among patients with sepsis and hypotension

## Supporting Material 1: Description of variables considered and their missing rate.

| Variable                                                   | Time Window  | Operator | Median (IQ 25-75)          | P-value         | Median Alive (IQ 25-75)    | Median Dead (IQ 25-75)      | Survivors Size | Non-survivors Size | Percentage of missing data |
|------------------------------------------------------------|--------------|----------|----------------------------|-----------------|----------------------------|-----------------------------|----------------|--------------------|----------------------------|
| Heart Rate - Diastolic Blood Pressure product (1/min/mmHg) | PER          | MAX      | 9900.00 (8306.00-11640.00) | 1.38E-03        | 9767.50 (8190.00-11556.00) | 10283.00 (8490.50-11927.25) | 1526           | 615                | 0.0                        |
| Potassium (mg/dL)                                          | PRE          |          | 3.80 (3.50-4.20)           | 1.47E-03        | 3.80 (3.50-4.20)           | 3.90 (3.50-4.40)            | 1301           | 524                | 14.8                       |
| <b>Hypotensive Episode Length (hrs)</b>                    | <b>N.A.</b>  |          | <b>1.75 (1.00-3.00)</b>    | <b>1.53E-03</b> | <b>1.50 (1.00-3.00)</b>    | <b>2.00 (1.00-3.75)</b>     | <b>1526</b>    | <b>616</b>         | <b>0.0</b>                 |
| Hemoglobin (g/dL)                                          | POST         |          | 9.60 (8.80-10.50)          | 1.76E-03        | 9.70 (8.90-10.50)          | 9.50 (8.60-10.50)           | 1414           | 577                | 7.0                        |
| Pulse Pressure (mmHg)                                      | PER          | MED      | 52.00 (43.50-62.00)        | 3.17E-03        | 52.50 (44.00-62.50)        | 50.25 (42.00-60.50)         | 1521           | 614                | 0.3                        |
| Hematocrit (%)                                             | DELTA        |          | -0.90 (-3.30-1.70)         | 3.31E-03        | -0.80 (-3.10-1.90)         | -1.20 (-3.73-1.00)          | 1231           | 493                | 19.5                       |
| Partial Carbon Dioxide Arterial Pressure (mmHg)            | PRE          |          | 40.00 (35.00-45.00)        | 4.42E-03        | 40.00 (36.00-45.00)        | 39.00 (33.00-45.00)         | 930            | 406                | 37.6                       |
| White Blood Cells count (x10 <sup>9</sup> /L)              | PRE          |          | 12.60 (8.79-17.80)         | 4.69E-03        | 12.35 (8.70-17.04)         | 13.60 (8.90-19.70)          | 1179           | 502                | 21.5                       |
| <b>Creatinine (mg/dL)</b>                                  | <b>DELTA</b> |          | <b>0.00 (-0.10-0.20)</b>   | <b>4.84E-03</b> | <b>0.00 (-0.10-0.15)</b>   | <b>0.00 (-0.10-0.30)</b>    | <b>1151</b>    | <b>486</b>         | <b>23.6</b>                |
| Creatinine Clearance (ml/min)                              | DELTA        |          | 0.00 (-5.81-4.02)          | 5.32E-03        | 0.00 (-6.14-5.57)          | -0.35 (-5.64-1.91)          | 763            | 365                | 47.3                       |
| Mean Arterial Blood Pressure (mmHg)                        | PRE          | MIN      | 56.00 (52.00-58.33)        | 5.93E-03        | 56.00 (52.00-58.67)        | 55.00 (51.00-58.00)         | 1520           | 615                | 0.3                        |
| Saturation of Peripheral Oxygen (%)                        | DELTA        | MAX      | 0.00 (-1.00-1.00)          | 6.14E-03        | 0.00 (-1.00-0.00)          | 0.00 (-1.00-1.00)           | 1504           | 593                | 2.1                        |
| Systolic Arterial Blood Pressure (mmHg)                    | PRE          | STD      | 12.31 (7.77-18.67)         | 7.59E-03        | 12.80 (7.93-19.06)         | 10.98 (7.05-16.95)          | 844            | 358                | 43.9                       |
| Oxygen Gradient (mmHg)                                     | DELTA        |          | -42.00 (-155.75-28.56)     | 9.55E-03        | -50.25 (-176.25-20.00)     | -24.25 (-134.56-40.19)      | 656            | 329                | 54.0                       |
| Heart Rate - Diastolic Blood Pressure product (1/min/mmHg) | PRE          | MED      | 9024.00 (7656.00-10640.00) | 1.07E-02        | 8957.25 (7638.00-10530.00) | 9310.00 (7763.00-10937.50)  | 1526           | 616                | 0.0                        |
| Sequential Organ Failure Assessment (SOFA)                 | DELTA        |          | 4.00 (1.00-8.00)           | 1.13E-02        | 4.00 (1.00-8.00)           | 4.00 (0.00-10.00)           | 1526           | 616                | 0.0                        |
| Pulse Pressure (mmHg)                                      | PRE          | MED      | 54.50 (45.00-66.00)        | 1.16E-02        | 55.00 (45.75-66.00)        | 52.88 (43.75-65.00)         | 1526           | 616                | 0.0                        |
| Cardiac Index (L/min/m <sup>2</sup> )                      | PER          | MAX      | 2.38 (1.91-2.99)           | 1.31E-02        | 2.32 (1.89-2.93)           | 2.50 (1.96-3.23)            | 839            | 333                | 45.3                       |
| Estimated Cardiac Output (-)                               | POST         | MIN      | 30.05 (24.27-36.38)        | 1.44E-02        | 29.78 (24.12-36.00)        | 31.26 (24.58-37.29)         | 1521           | 604                | 0.8                        |
| Difference with Ideal weight                               | ADM          |          | 15.39 (4.12-28.45)         | 1.57E-02        | 15.77 (5.29-29.16)         | 14.13 (2.13-25.26)          | 839            | 334                | 45.2                       |
| Cardiac Index (L/min/m <sup>2</sup> )                      | POST         | MIN      | 2.09 (1.69-2.65)           | 1.64E-02        | 2.06 (1.66-2.62)           | 2.16 (1.76-2.80)            | 837            | 325                | 45.8                       |

**Dynamic data during hypotensive episode improves mortality predictions among patients with sepsis and hypotension**

# Supporting Material 1: Description of variables considered and their missing rate.

| Variable                                                                    | Time Window  | Operator | Median (IQ 25-75)        | P-value         | Median Alive (IQ 25-75)  | Median Dead (IQ 25-75)   | Survivors Size | Non-survivors Size | Percentage of missing data |
|-----------------------------------------------------------------------------|--------------|----------|--------------------------|-----------------|--------------------------|--------------------------|----------------|--------------------|----------------------------|
| Estimated Cardiac Output (-)                                                | PRE          | MIN      | 31.40 (25.37-38.83)      | 1.95E-02        | 31.01 (25.02-38.23)      | 32.24 (25.90-40.44)      | 1509           | 615                | 0.8                        |
| Mean Arterial Blood Pressure (mmHg)                                         | DELTA        | STD      | -1.70 (-5.62-1.45)       | 2.11E-02        | -2.08 (-5.79-1.20)       | -1.22 (-5.07-2.36)       | 825            | 353                | 45.0                       |
| Cardiac Index (L/min/m^2)                                                   | PRE          | MED      | 2.26 (1.83-2.83)         | 2.17E-02        | 2.23 (1.80-2.80)         | 2.35 (1.85-2.92)         | 839            | 334                | 45.2                       |
| Partial Carbon Dioxyde Arterial Pressure (mmHg)                             | DELTA        |          | -1.00 (-7.00-4.00)       | 2.30E-02        | -2.00 (-7.00-3.00)       | -1.00 (-6.00-6.00)       | 775            | 366                | 46.7                       |
| Phosphorus (mg/dL)                                                          | DELTA        |          | -0.10 (-0.70-0.55)       | 2.35E-02        | -0.10 (-0.70-0.45)       | 0.10 (-0.70-0.70)        | 740            | 357                | 48.8                       |
| Weight (kg)                                                                 | ADM          |          | 77.00 (64.25-91.27)      | 2.48E-02        | 77.40 (65.00-92.00)      | 75.00 (63.00-89.58)      | 1420           | 595                | 5.9                        |
| Pulse Pressure (mmHg)                                                       | POST         | MED      | 55.50 (46.50-67.50)      | 2.73E-02        | 56.25 (47.00-67.50)      | 55.00 (45.00-66.75)      | 1525           | 614                | 0.1                        |
| Central Venous Pressure (mmHg)                                              | POST         | STD      | 1.52 (0.71-2.52)         | 2.75E-02        | 1.60 (0.82-2.62)         | 1.34 (0.58-2.43)         | 807            | 336                | 46.6                       |
| Diastolic Arterial Blood Pressure (mmHg)                                    | POST         | MED      | 47.50 (42.00-53.00)      | 2.78E-02        | 47.75 (42.50-53.25)      | 47.00 (41.50-52.50)      | 1526           | 615                | 0.0                        |
| Heart Rate (beats/min)                                                      | PER          | STD      | 3.58 (2.06-6.29)         | 2.79E-02        | 3.54 (2.00-6.12)         | 3.91 (2.12-6.77)         | 1526           | 616                | 0.0                        |
| Breathing Rate (resp/min)                                                   | PRE          | STD      | 2.59 (1.41-4.15)         | 2.80E-02        | 2.65 (1.50-4.15)         | 2.50 (1.15-4.19)         | 1507           | 611                | 1.1                        |
| Estimated Cardiac Output (-)                                                | PER          | MAX      | 33.80 (27.31-41.45)      | 3.11E-02        | 33.46 (27.10-40.51)      | 34.68 (27.94-42.74)      | 1525           | 613                | 0.2                        |
| Systolic Arterial Blood Pressure (mmHg)                                     | POST         | STD      | 9.57 (6.06-14.80)        | 3.25E-02        | 9.76 (6.36-15.30)        | 9.10 (5.64-13.67)        | 916            | 407                | 38.2                       |
| Body Surface (m^2)                                                          | ADM          |          | 14.18 (13.01-15.44)      | 3.25E-02        | 14.30 (13.08-15.52)      | 13.95 (12.91-15.33)      | 839            | 334                | 45.2                       |
| <b>Chloride (mEq/L)</b>                                                     | <b>DELTA</b> |          | <b>1.00 (-2.00-3.00)</b> | <b>3.41E-02</b> | <b>1.00 (-2.00-3.00)</b> | <b>1.00 (-1.00-3.00)</b> | <b>942</b>     | <b>378</b>         | <b>38.4</b>                |
| Potatium (mg/dL)                                                            | DELTA        |          | 0.00 (-0.40-0.40)        | 4.04E-02        | -0.10 (-0.50-0.30)       | 0.00 (-0.40-0.40)        | 1238           | 501                | 18.8                       |
| Breathing Rate (resp/min)                                                   | DELTA        | STD      | -0.17 (-1.74-1.25)       | 4.14E-02        | -0.27 (-1.79-1.20)       | 0.00 (-1.52-1.43)        | 1498           | 607                | 1.7                        |
| Temperature (°C)                                                            | DELTA        | MED      | 0.11 (-0.39-0.64)        | 4.44E-02        | 0.11 (-0.36-0.67)        | 0.06 (-0.44-0.58)        | 1479           | 588                | 3.5                        |
| Partial Arterial Oxygen Pressure to Fraction of Inspired Oxygen (PaO2/FiO2) | DELTA        |          | -2.00 (-80.63-62.69)     | 4.80E-02        | -3.67 (-93.00-60.50)     | 2.00 (-58.75-70.00)      | 656            | 329                | 54.0                       |
| Diastolic Arterial Blood Pressure (mmHg)                                    | DELTA        | MED      | 1.00 (-4.25-6.75)        | 5.47E-02        | 1.50 (-4.00-6.75)        | 0.50 (-5.00-6.44)        | 1526           | 615                | 0.0                        |
| Mean Arterial Blood Pressure (mmHg)                                         | DELTA        | MED      | 1.50 (-3.83-7.00)        | 6.93E-02        | 1.83 (-3.50-7.33)        | 1.16 (-4.17-6.17)        | 1526           | 615                | 0.0                        |
| Cardiac Output (L/min)                                                      | POST         | MED      | 5.93 (4.90-7.36)         | 7.28E-02        | 5.97 (5.00-7.40)         | 5.80 (4.58-7.33)         | 391            | 149                | 74.8                       |
| Heart Rate (beats/min)                                                      | DELTA        | MIN      | -1.00 (-7.00-4.00)       | 7.67E-02        | -1.00 (-6.00-4.00)       | -1.00 (-7.75-3.00)       | 1526           | 615                | 0.0                        |

Dynamic data during hypotensive episode improves mortality predictions among patients with sepsis and hypotension

# Supporting Material 1: Description of variables considered and their missing rate.

| Variable                                                   | Time Window | Operator   | Median (IQ 25-75)           | P-value         | Median Alive (IQ 25-75)     | Median Dead (IQ 25-75)      | Survivors Size | Non-survivors Size | Percentage of missing data |
|------------------------------------------------------------|-------------|------------|-----------------------------|-----------------|-----------------------------|-----------------------------|----------------|--------------------|----------------------------|
| Peak Expiratory Flow (L/min)                               | ADM         |            | 487.94 (411.70-559.82)      | 7.81E-02        | 490.33 (414.41-564.23)      | 482.24 (406.12-549.98)      | 800            | 320                | 47.7                       |
| Heart Rate - Diastolic Blood Pressure product (1/min/mmHg) | POST        | MAX        | 10751.00 (9016.00-12738.50) | 8.39E-02        | 10687.00 (8970.00-12720.00) | 10970.00 (9216.00-12862.00) | 1526           | 614                | 0.1                        |
| Hematocrit (%)                                             | POST        |            | 30.60 (28.30-33.10)         | 9.24E-02        | 30.50 (28.30-33.00)         | 30.80 (28.20-33.60)         | 1442           | 585                | 5.4                        |
| Diastolic Arterial Blood Pressure (mmHg)                   | PER         | MIN        | 37.50 (32.00-42.00)         | 9.64E-02        | 37.50 (32.50-42.00)         | 37.00 (31.00-41.50)         | 1517           | 613                | 0.6                        |
| Hemoglobin (g/dL)                                          | DELTA       |            | -0.30 (-1.10-0.40)          | 1.15E-01        | -0.40 (-1.10-0.40)          | -0.20 (-1.00-0.50)          | 1114           | 472                | 26.0                       |
| Hematocrit (%)                                             | PRE         |            | 28.80 (25.80-32.00)         | 1.17E-01        | 28.70 (25.80-32.00)         | 29.10 (25.90-32.10)         | 1294           | 519                | 15.4                       |
| Systolic Ejection Volume (L)                               | PRE         | MED        | 0.37 (0.31-0.43)            | 1.19E-01        | 0.37 (0.31-0.43)            | 0.36 (0.30-0.43)            | 1526           | 616                | 0.0                        |
| Calcium (mg/dL)                                            | POST        |            | 7.90 (7.40-8.40)            | 1.20E-01        | 7.90 (7.40-8.40)            | 7.80 (7.40-8.30)            | 974            | 426                | 34.6                       |
| Sodium (mg/dL)                                             | DELTA       |            | 0.00 (-1.00-2.00)           | 1.23E-01        | 0.00 (-1.00-2.00)           | 0.00 (-2.00-2.00)           | 1198           | 491                | 21.1                       |
| <b>Diastolic Arterial Blood Pressure (mmHg)</b>            | <b>PRE</b>  | <b>MIN</b> | <b>39.00 (34.00-43.00)</b>  | <b>1.30E-01</b> | <b>39.00 (34.00-43.00)</b>  | <b>38.50 (33.00-43.00)</b>  | <b>1515</b>    | <b>615</b>         | <b>0.6</b>                 |
| Heart Rate - Diastolic Blood Pressure product (1/min/mmHg) | DELTA       | MED        | 53.75 (-1011.38-1034.75)    | 1.34E-01        | 70.75 (-949.50-1060.50)     | 13.00 (-1185.00-977.75)     | 1526           | 614                | 0.1                        |
| Platelets (10 <sup>3</sup> /µL)                            | DELTA       |            | -9.00 (-36.00-14.00)        | 1.41E-01        | -9.00 (-36.00-16.50)        | -8.00 (-38.00-10.00)        | 1148           | 478                | 24.1                       |
| Systolic Ejection Volume (L)                               | PER         | MED        | 0.39 (0.33-0.46)            | 1.83E-01        | 0.39 (0.33-0.46)            | 0.38 (0.32-0.45)            | 1521           | 614                | 0.3                        |
| Breathing Rate (resp/min)                                  | DELTA       | MED        | 0.00 (-2.50-2.50)           | 1.93E-01        | 0.00 (-2.00-2.50)           | 0.00 (-2.50-2.00)           | 1498           | 607                | 1.7                        |
| Systolic Arterial Blood Pressure (mmHg)                    | DELTA       | MAX        | 1.00 (-10.00-13.00)         | 1.93E-01        | 2.00 (-10.00-14.00)         | 0.00 (-11.00-12.00)         | 1526           | 615                | 0.0                        |
| Sodium (mg/dL)                                             | POST        |            | 138.00 (135.00-142.00)      | 2.02E-01        | 138.00 (135.00-141.00)      | 138.00 (134.00-142.00)      | 1429           | 581                | 6.2                        |
| Breathing Rate (resp/min)                                  | PER         | STD        | 2.12 (1.04-3.69)            | 2.09E-01        | 2.12 (1.03-3.59)            | 2.29 (1.12-3.89)            | 1496           | 606                | 1.9                        |
| Cardiac Output (L/min)                                     | PRE         |            | 4.90 (3.86-6.55)            | 2.23E-01        | 5.00 (3.94-6.57)            | 4.81 (3.30-6.26)            | 348            | 106                | 78.8                       |
| <b>Heart Rate (beats/min)</b>                              | <b>PRE</b>  | <b>STD</b> | <b>4.08 (2.22-6.95)</b>     | <b>2.25E-01</b> | <b>4.25 (2.31-6.95)</b>     | <b>3.77 (2.16-6.86)</b>     | <b>1526</b>    | <b>616</b>         | <b>0.0</b>                 |
| Calcium (mg/dL)                                            | PRE         |            | 8.10 (7.60-8.70)            | 2.39E-01        | 8.10 (7.60-8.60)            | 8.20 (7.60-8.80)            | 810            | 381                | 44.4                       |
| Mean Arterial Blood Pressure (mmHg)                        | POST        | STD        | 5.87 (3.87-9.35)            | 2.40E-01        | 5.98 (4.03-9.56)            | 5.71 (3.61-8.90)            | 911            | 405                | 38.6                       |
| Calcium (mg/dL)                                            | DELTA       |            | -0.10 (-0.50-0.30)          | 2.45E-01        | 0.00 (-0.50-0.30)           | -0.10 (-0.55-0.30)          | 728            | 352                | 49.6                       |
| Systolic Arterial Blood Pressure (mmHg)                    | DELTA       | STD        | -2.14 (-7.99-2.80)          | 3.36E-01        | -2.24 (-8.25-2.72)          | -1.99 (-7.33-3.02)          | 830            | 354                | 44.7                       |
| Magnesium (mg/dL)                                          | DELTA       |            | 0.00 (-0.20-0.20)           | 3.40E-01        | 0.00 (-0.20-0.30)           | 0.00 (-0.20-0.20)           | 825            | 370                | 44.2                       |

Dynamic data during hypotensive episode improves mortality predictions among patients with sepsis and hypotension



## Supporting Material 1: Description of variables considered and their missing rate.

| Variable                                                 | Time Window | Operator | Median (IQ 25-75)        | P-value  | Median Alive (IQ 25-75)  | Median Dead (IQ 25-75)   | Survivors Size | Non-survivors Size | Percentage of missing data |
|----------------------------------------------------------|-------------|----------|--------------------------|----------|--------------------------|--------------------------|----------------|--------------------|----------------------------|
| GENDER (Male==1)                                         | ADM         |          | 1.00 (1.00-2.00)         | 3.89E-01 | 1.00 (1.00-2.00)         | 1.00 (1.00-2.00)         | 1525           | 616                | 0.0                        |
| Pulse Pressure (mmHg)                                    | DELTA       | MAX      | 1.50 (-10.50-12.00)      | 3.95E-01 | 1.50 (-10.50-12.00)      | 1.25 (-10.50-11.00)      | 1513           | 610                | 0.9                        |
| Invasive Mean Arterial Blood Pressure (mmHg)             | PRE         | STD      | 7.61 (4.37-11.70)        | 4.05E-01 | 7.42 (4.48-11.64)        | 8.14 (4.04-12.31)        | 990            | 393                | 35.4                       |
| Heart Rate (beats/min)                                   | DELTA       | STD      | -0.27 (-2.71-1.96)       | 4.09E-01 | -0.31 (-2.74-1.89)       | -0.17 (-2.63-2.02)       | 1526           | 615                | 0.0                        |
| Systolic Arterial Blood Pressure (mmHg)                  | PER         | STD      | 10.48 (6.34-16.40)       | 4.09E-01 | 10.61 (6.36-16.99)       | 10.26 (6.32-15.14)       | 877            | 372                | 41.7                       |
| Sodium (mg/dL)                                           | PRE         |          | 139.00 (136.00-142.00)   | 4.30E-01 | 139.00 (136.00-142.00)   | 139.00 (135.00-143.00)   | 1275           | 517                | 16.3                       |
| Hemoglobin (g/dL)                                        | PRE         |          | 9.90 (8.90-10.90)        | 4.55E-01 | 9.90 (9.00-11.00)        | 9.80 (8.80-10.80)        | 1190           | 502                | 21.0                       |
| Central Venous Pressure (mmHg)                           | DELTA       | STD      | 0.00 (-1.07-1.10)        | 4.71E-01 | 0.00 (-1.10-1.10)        | 0.03 (-0.96-1.10)        | 683            | 259                | 56.0                       |
| Invasive Systolic Arterial Blood Pressure (mmHg)         | POST        | STD      | 7.07 (3.79-10.88)        | 4.77E-01 | 7.04 (3.78-10.72)        | 7.27 (3.81-11.59)        | 983            | 378                | 36.5                       |
| Cardiac Output (L/min)                                   | DELTA       | MAX      | 0.55 (-0.62-1.70)        | 4.97E-01 | 0.60 (-0.52-1.77)        | 0.38 (-0.91-1.59)        | 308            | 94                 | 81.2                       |
| Fluid administred (mL)                                   | PER         |          | 1750.00 (750.00-3500.00) | 4.99E-01 | 1650.00 (750.00-3500.00) | 2000.00 (525.00-3750.00) | 1526           | 616                | 0.0                        |
| Systolic Ejection Volume (L)                             | POST        | MED      | 0.37 (0.31-0.43)         | 5.25E-01 | 0.37 (0.31-0.43)         | 0.37 (0.31-0.43)         | 1525           | 613                | 0.2                        |
| Glucose (mg/dL)                                          | PRE         |          | 112.00 (91.00-139.00)    | 5.42E-01 | 112.00 (92.00-139.00)    | 113.00 (89.00-138.00)    | 1299           | 521                | 15.0                       |
| Invasive Mean Arterial Blood Pressure (mmHg)             | PER         | STD      | 6.12 (3.77-9.43)         | 5.87E-01 | 6.15 (3.80-9.49)         | 6.05 (3.76-9.19)         | 1007           | 398                | 34.4                       |
| Blood Urea Nitrogen (mg/dL)CreatR                        | DELTA       |          | -0.25 (-3.07-2.00)       | 6.34E-01 | -0.12 (-3.23-2.18)       | -0.43 (-2.63-1.45)       | 1150           | 486                | 23.6                       |
| Cardiac Index (L/min/m <sup>2</sup> )                    | DELTA       | MED      | -0.04 (-0.34-0.27)       | 6.93E-01 | -0.03 (-0.34-0.27)       | -0.04 (-0.36-0.29)       | 839            | 332                | 45.3                       |
| Mean Arterial Blood Pressure (mmHg)                      | PER         | STD      | 6.50 (3.95-10.61)        | 6.98E-01 | 6.50 (3.87-10.96)        | 6.51 (4.04-10.21)        | 868            | 370                | 42.2                       |
| Invasive Systolic Arterial Blood Pressure (mmHg)         | PRE         | STD      | 9.18 (4.90-15.26)        | 7.01E-01 | 9.25 (4.94-15.12)        | 8.97 (4.48-15.57)        | 991            | 393                | 35.4                       |
| Systolic Ejection Volume (L)                             | DELTA       | MIN      | -0.01 (-0.07-0.04)       | 7.02E-01 | -0.01 (-0.07-0.04)       | -0.01 (-0.07-0.04)       | 1503           | 602                | 1.7                        |
| Invasive Mean Arterial Blood Pressure (mmHg)             | POST        | STD      | 5.11 (2.87-8.46)         | 7.17E-01 | 5.16 (2.82-8.21)         | 5.03 (2.98-8.82)         | 981            | 377                | 36.6                       |
| Heart Rate to Systolic Blood Pressure Ratio (1/min/mmHg) | DELTA       | MAX      | -0.03 (-0.13-0.07)       | 7.46E-01 | -0.03 (-0.12-0.06)       | -0.03 (-0.15-0.09)       | 1526           | 614                | 0.1                        |

**Dynamic data during hypotensive episode improves mortality predictions among patients with sepsis and hypotension**

## Supporting Material 1: Description of variables considered and their missing rate.

| Variable                                         | Time Window | Operator | Median (IQ 25-75)      | P-value  | Median Alive (IQ 25-75) | Median Dead (IQ 25-75) | Survivors Size | Non-survivors Size | Percentage of missing data |
|--------------------------------------------------|-------------|----------|------------------------|----------|-------------------------|------------------------|----------------|--------------------|----------------------------|
| Saturation of Peripheral Oxygen (%)              | DELTA       | STD      | 0.00 (-0.72-0.70)      | 7.76E-01 | 0.00 (-0.71-0.68)       | 0.00 (-0.76-0.75)      | 1504           | 593                | 2.1                        |
| Invasive Mean Arterial Blood Pressure (mmHg)     | DELTA       | STD      | -2.29 (-6.95-1.49)     | 7.87E-01 | -2.31 (-6.92-1.52)      | -2.13 (-7.11-1.29)     | 905            | 347                | 41.5                       |
| Central Venous Pressure (mmHg)                   | PER         | STD      | 1.53 (0.71-2.81)       | 8.17E-01 | 1.53 (0.71-2.72)        | 1.48 (0.58-2.88)       | 759            | 318                | 49.7                       |
| Breathing Rate (resp/min)                        | POST        | STD      | 2.35 (1.26-3.87)       | 8.27E-01 | 2.30 (1.26-3.79)        | 2.38 (1.26-3.91)       | 1504           | 611                | 1.3                        |
| Estimated Cardiac Output (-)                     | DELTA       | MED      | -0.64 (-5.11-3.60)     | 8.61E-01 | -0.59 (-5.27-3.53)      | -0.85 (-4.98-3.78)     | 1525           | 613                | 0.2                        |
| Central Venous Pressure (mmHg)                   | DELTA       | MIN      | 1.00 (-1.00-3.00)      | 9.24E-01 | 1.00 (-1.00-3.00)       | 1.00 (-1.00-3.00)      | 683            | 259                | 56.0                       |
| Invasive Systolic Arterial Blood Pressure (mmHg) | PER         | STD      | 7.88 (4.58-12.40)      | 9.26E-01 | 7.86 (4.53-12.44)       | 7.96 (4.72-12.40)      | 1011           | 398                | 34.2                       |
| Height (cm)                                      | ADM         |          | 167.64 (160.02-177.80) | 9.33E-01 | 170.18 (160.02-177.80)  | 167.64 (160.02-177.80) | 843            | 337                | 44.9                       |
| Invasive Systolic Arterial Blood Pressure (mmHg) | DELTA       | STD      | -2.33 (-8.16-2.64)     | 9.92E-01 | -2.45 (-7.93-2.68)      | -1.97 (-9.13-2.50)     | 907            | 348                | 41.4                       |
| Heart Rate (beats/min)                           | POST        | STD      | 3.74 (2.17-6.15)       | 9.97E-01 | 3.79 (2.22-6.06)        | 3.60 (2.08-6.34)       | 1526           | 615                | 0.0                        |

Dynamic data during hypotensive episode improves mortality predictions among patients with sepsis and hypotension
